# Supplementary material for: Neurodevelopment in Children Exposed to Zika in utero: Clinical and Molecular Aspects
Source: Front Genet. 2022 Mar 8;13:758715. doi: 10.3389/fgene.2022.758715 (PMC8957982; doi:10.3389/fgene.2022.758715)
Supplement: Supplementary file 4 [file Table4.docx]

| **Supplementary Table 4.**Summaryofstudiesusingbiosystemsapproachanditsmainfindings | | | | | | | | |
| --- | --- | --- | --- | --- | --- | --- | --- | --- |
| **Author(year)** | | **Aim** | **Celltype** | **Molecularanalyses** | **Systembiologytools** | **Molecularresults** | **Applicationofsystembiologyanalyses** | **Relationshipofmolecularresultsandneurologicaloutcomes** |
| Aguiar *et al.* (2020)1 | | To perform a multiomics analysis in postmortem brains of neonates with CZS | Postmortem brains | Exome  Transcriptome  Proteome | NetworkAnalyst, STRING, and Cytoscape | Reduced expression (RNA and protein) of collagen genes and upregulation of cell adhesion genes | To integrate the exome, transcriptome and proteome findings | Collagen genes have been previously associated to arthrogryposis and cell adhesion factors to neuronal migration and axon guidance |
| Anderson *et al.* (2020)2 | | To determine whether ZIKV modulates host cell epigenetic profiles *in vivo* | Blood cells | Genome-wide DNA methylation profiling | Packages in R | Altered host methylation patterns, especially at *RABGAP1L* - important in brain development -, at viral host immunity genes *MX1* and *ISG15*, and in an epigenetic module containing the causal microcephaly gene *MCPH1* | To identify differentially regulated modules of genes that may be contributing to the microcephaly phenotype | Given the importance of the affected genes to brain development and antiviral response, their altered methylation could the clinical signs of CZS |
| Park *et al*.(2020)4 | | TodescribemolecularalterationsduetheZIKVinfection *in vitro* | hPNs,hNCCs,mDCs | Transcriptome | PPIinSTRING,Cytoscape | ThederegulatedgeneswererelatedtoDNArepairandprolactinsignalingaswellastheinterferonsignaling,neuroinflammation,andcellcyclepathways | Toperformaprotein-proteininteractionanalysisoftheDGEgenesidentifiedinRNA-seq | Neuronalcelldamageoccurredthroughup-regulationofneuroinflammationanddown-regulationoftheDNArepairsystem |
| Saade *et al.* (2020)5 | | To investigate the interaction between ZikV-NS5 protein with the interactome of hNPCs | hNPCs | Zika-host proteome interaction | PPI network, Gene Ontology enrichment | Enrichment of cytoskeleton, especially microtubule, host proteins that interact with ZikV-NS5 | To identify the Gene Ontologies of the human proteins that interact with ZikV-NS5, according to the human fetal brain library | The identification of these proteins might help to understand how ZIKV impacts neurogenesis |
| Souza *et al*.(2020)6 | | *In silico* protocol:keygenesandpathwaysforemergingvirusdiseasepathogenesis | Human neuralcellsinfectedwithZIKV | Transcriptome | PPInetwork:Gephi,STRING,Cytoscape | 30DEGs(24upand6down)associatedtoendoplasmicreticulumstressandDNAreplication.Neurogenesisand/orapoptosis | Integrativeanalysisoftheupanddownregulatedgenes | Downregulationof *CENPF*, *MCM2, MCM4, MCM6* genes(DNAreplicationonneocortex)possiblyrelatedtomicrocephaly |
| Tabari *et al.* (2020)7 | | To profile the host transcriptome after ZIKV infection | hNSC infected with ZIKV Uganda and French Polinesia strains | Transcriptome and miRnome | Reactome signaling pathways and networks | Upregulation of genes included in antiviral infection signaling, ER stress, and unfolded proteins pathways. Downregulation of signal transduction, cell cycle, and gene expression related pathways. | To identify the signaling pathways the perturbed genes are associated with | *ASNS*, a gene previously associated to microcephaly,was perturbed by both strains |
| Beys-da-Silva *et al*.(2019)8 | | TodescribeproteomealterationsduetheZIKVinfection *in vitro* | hMSC | Shotgunproteomics | PPIinSTRING,Cytoscape | Reprogrammingofthemetabolicmachineryandpotentialinhibitionofautophagy,neurogenesis,andimmuneresponse;ProteinsrelatedtoAlzheimer’sdisease,autismspectrumdisorder,amyotrophiclateralsclerosis,andParkinson’sdisease,hadtheirexpressionalteredduetoZIKV | Toassociatederegulatedgeneswithhumanbraindiseases | ThemolecularpathwaysaffectedbyZIKVinhMSCarerelatedtobraindiseases |
| Dang *et al*.(2019)9 | | RoleofmiRNAsinZIKVpathogenesisandmicrocephaly | hNSCs | mRNAandmiRNAtranscriptomes | miRNA-mRNAinteractionsCytoscape, | UpregulationofsomemiRNA(e.g.let-7candmiR-124–3p),repressorscellcycle,stemcellmaintenance,andneurogenesisgenes | To analyzemiRNA-mRNAinteractionsinhNSCinfectedcells | ZIKVupregulatedmiR124–3panddownregulatedthetransferrinreceptor(*TFRC*)inZIKV-infectedhNSCs-NSCmaintenancedysregulated |
| Lima *et al*.(2019)10 | | TranscriptionalchangesinducedbyZIKVinfection *in vitro* | hiNPCs | Transcriptome | PPIin  STRING,Cytoscape | Inductionoftype-Iinterferons(IFN-I)IFN-Isstimulatedgenes(ISGs):cytokinesandpro-apoptoticchemokinesCXCL9andCXCL10 | To identify specificnetworksinducedbyZIKVininfectedhiNPCs | UnbalancedandchroniclocalinflammatoryresponseelicitedbyZIKVinfection,whichcontributestodamagetothefetalbrain |
| Brahma *et al*.(2018)11 | Tohaveasystems-levelunderstandingofbiologicalprocessaffectedbyZIKVinfetalbrain | | HumanfetalNSCs | Transcriptome | PPIin  STRING,Cytoscape | 613downregulatedgenes:defenseresponsetovirus,receptorbinding,lamininbinding,extracellularmatrixandendoplasmicreticulum.471upregulated:translationinitiation,RNAbinding | ToidentifycandidategenesassociatedtoZIKVinfectionthroughanetwork-basedanalysis,assemblingPPInetworks | Pathwayssuchassystemiclupuserythematosus,defenseresponsestovirus,ribosomestructure,chromosome,andplateletscouldbeallinvolvedinZIKVmicrocephaly |
| Caires-Júnior *et al*.(2018)12 | GeneexpressionofcellsfromCZS-affectedandCZS-unaffectedtwins | | hNPCsderived | Transcriptome | NetworksofenrichedGOinMetascape | 64DEGsassociatedwithregionalization,embryonicmorphogenesis,embryodevelopmentandcentralnervoussystemdevelopmentontologies | To evaluateinteractionsbetweenenrichedgeneontologies | Differentialexpressionofneuraldevelopmentgenes(e.g. *DDIT4L*)maycontributetothedifferentsusceptibilitiestotheZIKVBRinfection |
| Janssens *et al*.(2018)13 | ZIKV  infectionintheneuralDNAmethylation | | Human NPCs,astrocytes,differentiatedneurons | Methylome | *psygenetR*  package(Rlanguage) | ZIKValtersDNAmethylationatspecificgenelociimplicatedinthepathogenesisofbraindisorders,especiallyneuropsychiatricdisorders | Networkassociatinggenesdifferentiallymethylatedandneuropsychiatricdisorders | ZIKV-inducedmethylationchangessuggestthatinfectionduringfetaldevelopmentcouldleadtoaspectrumoflate-onsetneuropsychiatricdisorders |
| Garcez *et al*.(2017)14 | TodescribemolecularalterationsduetheZIKVinfectioninvitro | | HumanneurospheresderivedfromiPS | Transcriptomeandproteome | PPIinSTRING | Upregulationofresponsetoviralreplication,DNAdamage,cellcyclearrestandapoptosispathways,downregulationofneuronaldifferentiation | To create a interactomemapofproteinsandgenesalteredbyZIKVinfection | ZIKVdownregulatestheneurogenesisandincreasescelldeathinprogenitorcells,whichcouldberelatedtotheZIKVcongenitalsyndrome |
| Moni *et al*.(2017)15 | | TounderstandthemechanismofZika-associateddisordersthroughinfectomeanddiseasomeanalysesofZIKVinfection | hiPSCsandhNPCs | Transcriptome | Cytoscape | 341genesupregulated:ProteinprocessinginendoplasmicreticulumandtransferRNAbiosynthesissignalingpathways;588genesdownregulated:Cellcycle,DNAreplication,andFanconianemiapathways | To analyze a networkcontainingdatarelatedtoZIKVinfectome,diseasomeandassociatedcomorbidities | InterlinkedgenesbetweenZIKVinfectionandotherdiseasesindicatesthatmetabolic,neurological,andcancerdiseasecategoriesarepossiblyimplicatedinZIKVinfectionandmalformations |
| Rolfe *et al*.(2016)16 | | ToanalyzedthetranscriptionalchangesinducedbyZIKVinfection *in vitro* | hNPCs | Transcriptome | Cytoscape,ClueGOapp | Upregulatedgenesrelatedtonucleicacidmetabolismregulationpathway.Enrichmentofnumerouspro-inflammatorypathways.Downregulatedgenesrelatedtochromosomesegregation. | ToprovideanetworkofthebiologicalprocessesassociatedtoZIKVinfection | Enrichmentofpro-inflammatorypathwayscausesCNScytotoxicpro-inflammatoryenvironmentthatcouldinducecelldeath.DGEassociationwithneurologicalclinicalphenotypes,suchasmicrocephaly,epilepsy |
| Zhang *et al*.(2016)17 | | TodescribemolecularalterationsduetheZIKVinfectioninvitro | hNPCs | Transcriptome | Gene-geneinteractionnetworksGeneMania | TheAsianZIKVinduceddysregulationofDNAreplicationandrepairgenes(e.g. *TP53*),andtheupregulationofviralresponsegenes,TypeIIinterferonsignaling,Toll-likereceptorsignalingandTNFsignalingpathways | To evaluate gene-geneinteractionsthatcouldbeconsideredmolecularsignaturesfortheinfectionofdifferentZIKVstrains | Thep53upregulationcouldplayapivotalroleintheapoptosisinhNPCs |
| PPI:Protein-proteininteraction;String:Stringdatabase;Cytoscape:Cytoscapesoftware;Gephi:Gephisoftware;ClueGO:ClueGOapp;GO:Geneontology;hiNPCs:Humaninducedneuroprogenitorcells;CZS: Congenital Zika Syndrome; NPCs:Neuroprogenitorcells;hNPCs:Humanneuroprogenitorcells;iPS:inducedpluripotentstem;hPNs:Peripheralneurons,hNCCs:neuralcrestcells;mDCs:myeloiddendriticcells;hMSC:Humanmesenchymalstemcells;DGE:differentialgeneexpressed. | | | | | | | | |

**References:**

1. Aguiar, R. S., Pohl, F., Morais, G. L., Nogueira, F., Carvalho, J. B., Guida, L., Arge, L., Melo, A., Moreira, M., Cunha, D. P., Gomes, L., Portari, E. A., Velasquez, E., Melani, R. D., Pezzuto, P., de Castro, F. L., Geddes, V., Gerber, A. L., Azevedo, G. S., Schamber-Reis, B. L., … Nakaya, H. I. (2020). Molecular alterations in the extracellular matrix in the brains of newborns with congenital Zika syndrome. *Science signaling*, **13(635),** eaay6736.
2. Anderson D, Neri JICF, Souza CRM, Valverde JG, De Araújo JMG, Nascimento MDSB, Branco RCC, Arrais NMR, Lassmann T, Blackwell JM, Jeronimo SMB. Zika Virus Changes Methylation of Genes Involved in Immune Response and Neural Development in Brazilian Babies Born With Congenital Microcephaly. *J Infect Dis* 2021; **223**(3): 435-440.
3. Park T, Kang MG, Baek SH, Lee CH, Park D. Zika virus infection differentially affects genome-wide transcription in neuronal cells and myeloid dendritic cells. *PLoS One* 2020; **15**(4): e0231049.
4. Saade, M., Ferrero, D. S., Blanco-Ameijeiras, J., Gonzalez-Gobartt, E., Flores-Mendez, M., Ruiz-Arroyo, V. M., Martínez-Sáez, E., Ramón Y Cajal, S., Akizu, N., Verdaguer, N., & Martí, E. (2020). Multimerization of Zika Virus-NS5 Causes Ciliopathy and Forces Premature Neurogenesis. *Cell stem cell*, **27(6),** 920–936.e8.
5. Souza GAP, Salvador EA, de Oliveira FR, Cotta Malaquias LC, Abrahão JS, Leomil Coelho LF. An in silico integrative protocol for identifying key genes and pathways useful to understand emerging virus disease pathogenesis. *Virus Res* 2020; **284**: 197986.
6. Tabari, D., Scholl, C., Steffens, M., Weickhardt, S., Elgner, F., Bender, D., Herrlein, M. L., Sabino, C., Semkova, V., Peitz, M., Till, A., Brüstle, O., Hildt, E., & Stingl, J. (2020). Impact of Zika Virus Infection on Human Neural Stem Cell MicroRNA Signatures. *Viruses*, **12(11),** 1219.
7. Beys-da-Silva WO, Rosa RL, Santi L, Berger M, Park SK, Campos AR, *et al*. Zika virus infection of human mesenchymal stem cells promotes differential expression of proteins linked to several neurological diseases. *Mol Neurobiol* 2019; **56**: 4708–17.
8. Dang JW, Tiwari SK, Qin Y, Rana TM. Genome-wide Integrative Analysis of Zika-Virus-Infected Neuronal Stem Cells Reveals Roles for MicroRNAs in Cell Cycle and Stemness. *Cell Rep* 2019; **27**(12): 3618–28.e5.
9. Lima MC, de Mendonça LR, Rezende AM, Carrera RM, Aníbal-Silva CE, Demers M, *et al*. The Transcriptional and Protein Profile From Human Infected Neuroprogenitor Cells Is Strongly Correlated to Zika Virus Microcephaly Cytokines Phenotype Evidencing a Persistent Inflammation in the CNS. *Front Immunol* 2019; **10**: 1928.
10. Brahma R, Gurumayum S, Naorem LD, Muthaiyan M, Gopal J, Venkatesan A. Identification of Hub Genes and Pathways in Zika Virus Infection Using RNA-Seq Data: A Network-Based Computational Approach. *Viral Immunol* 2018; **31**(4): 321–32.
11. Caires-Júnior LC, Goulart E, Melo US, Araujo BHS, Alvizi L, Soares-Schanoski A, *et al*. Discordant congenital Zika syndrome twins show differential in vitro viral susceptibility of neural progenitor cells [published correction appears in *Nat Commun* 2018 Mar 13; **9**(1):1114]. *Nat Commun* 2018; **9**(1):475.
12. Janssens S, Schotsaert M, Karnik R, Balasubramaniam V, Dejosez M, Meissner A, *et al*. Zika Virus Alters DNA Methylation of Neural Genes in an Organoid Model of the Developing Human Brain. *mSystems* 2018; **3**(1):e00219-17.
13. Garcez PP, Nascimento JM, de Vasconcelos JM, Madeiro da Costa R, Delvecchio R, Trindade P, *et al*. Zika virus disrupts molecular fingerprinting of human neurospheres. *Sci Rep* 2017; **7**: 40780.
14. Moni MA, Lio' P. Genetic Profiling and Comorbidities of Zika Infection. *J Infect Dis* 2017; **216**(6): 703–12.
15. Rolfe AJ, Bosco DB, Wang J, Nowakowski RS, Fan J, Ren Y. Bioinformatic analysis reveals the expression of unique transcriptomic signatures in Zika virus infected human neural stem cells. *Cell Biosci* 2016; **6**: 42.
16. Zhang F, Hammack C, Ogden SC, Cheng Y, Lee EM, Wen Z, *et al*. Molecular signatures associated with ZIKV exposure in human cortical neural progenitors. *Nucleic Acids Res* 2016; **44**(18): 8610–20.
